# Supplementary material for: Multi-trial analysis of HIV-1 envelope gp41-reactive antibodies among global recipients of candidate HIV-1 vaccines
Source: PubMed Central journal article supplement (PMC9597301; doi:10.3389/fimmu.2022.983313), 2022-10-12
Supplement: DataSheet_1.pdf [file DataSheet_1.pdf]

## Multi-trial analysis of HIV-1 envelope gp41-reactive immunoglobulin antibodies among global recipients of candidate HIV-1 vaccines

Koshlan Mayer-Blackwell<sup>1</sup>, Andrew M. Johnson<sup>1</sup>, Nicole Potchen<sup>1</sup>, Samuel S. Minot<sup>1</sup>, Jack Heptinstall<sup>2,3</sup>, Kelly Seaton<sup>2,3</sup>, Sheetal Sawant<sup>2,3</sup>, Xiaoying Shen<sup>2,3</sup>, Georgia D. Tomaras<sup>2,3</sup>, Andrew-Fiore Gartland<sup>1\*\*</sup>, James Kublin<sup>1\*\*</sup>

<sup>1</sup> Vaccine and Infectious Disease Division, Fred Hutchinson Cancer Research Center, Seattle, WA, USA

<sup>2</sup> Center for Human Systems Immunology, Duke University, Durham, NC, USA

<sup>3</sup> Department of Surgery, Duke University, Durham, NC, USA

\*\* Corresponding Authors

### Supplemental Figures

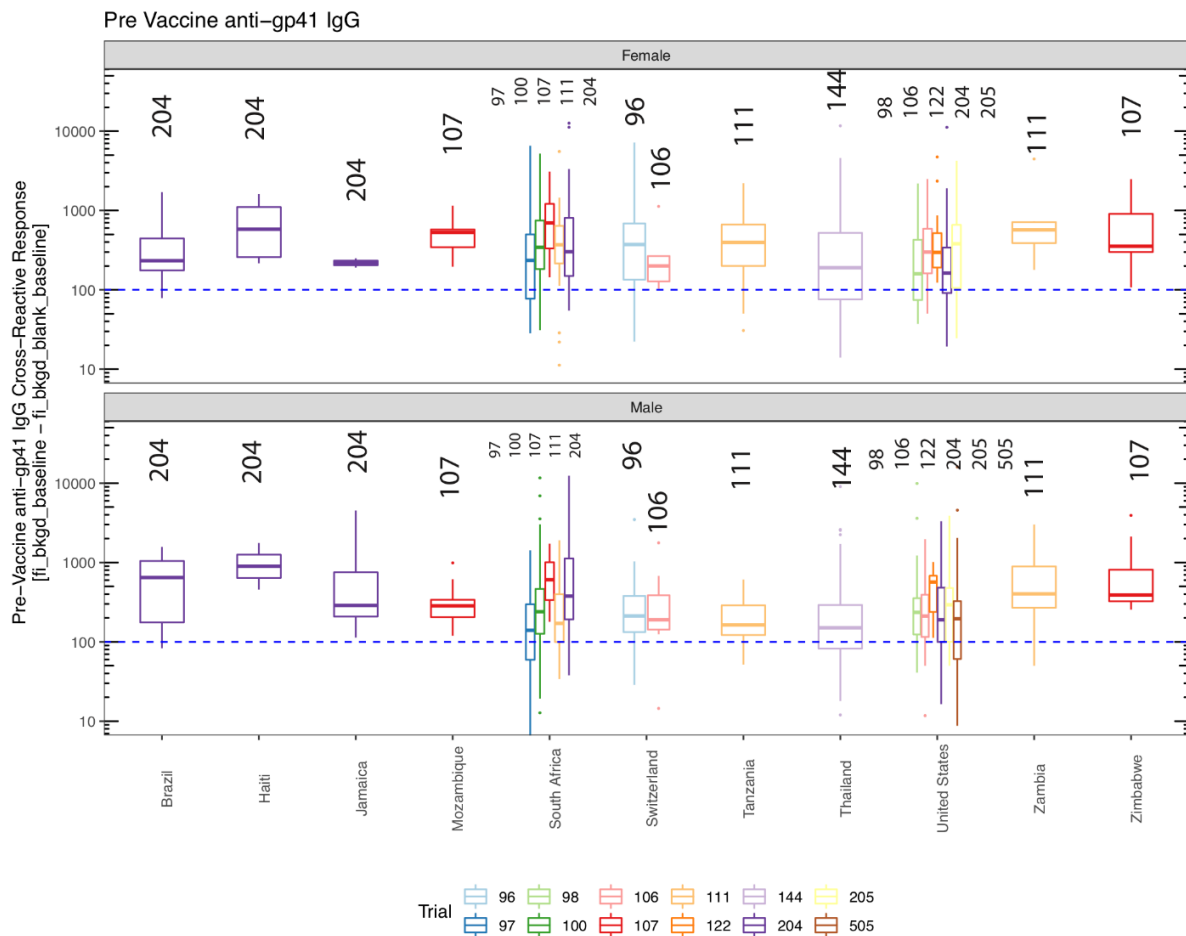

**Figure S1.** Heterogeneity in pre-vaccine cross-reactive anti-gp41 IgG response measured by BAMA by sex, country, and HVTN Trial number. Boxplots indicate the median and extent of the interquartile range, with whiskers indicating 1.5 times the IQR or the most extreme value. Units are fluorescence intensity (FI) in the BAMA assay adjusting for the signal measured from a negative control (blank bead)

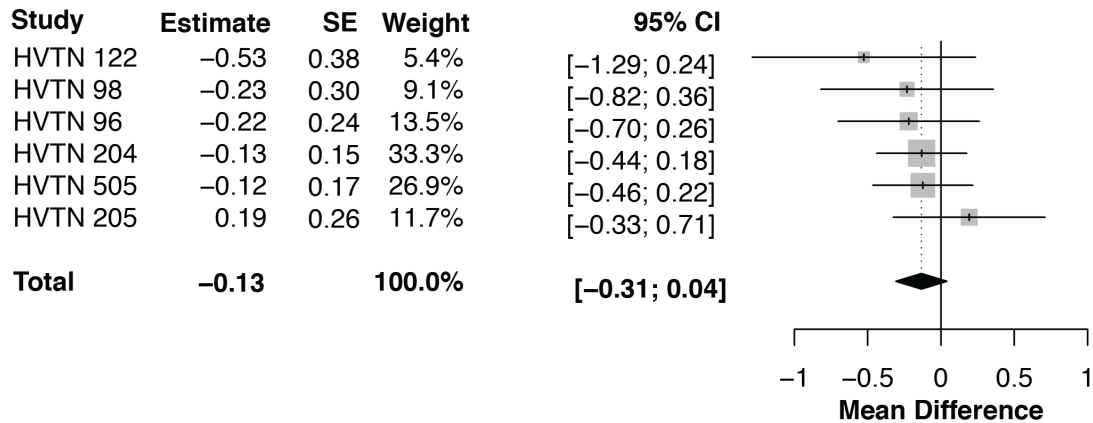

**Figure S2.** Difference in post-vaccine anti-gp120 IgG comparing trial participants with pre-vaccine anti-gp41 IgG level above and below the median. Estimates and total pooled mean difference were estimated using random effects meta-analysis (see Methods for details). Anti-gp120 IgG was measured using a vaccine matched antigen from protocols where vaccines included gp41, excluding HVTN 106. Forest plot indicates estimated difference for each study, using size of the gray square to indicate study size, and horizontal line to indicate 95% CI.

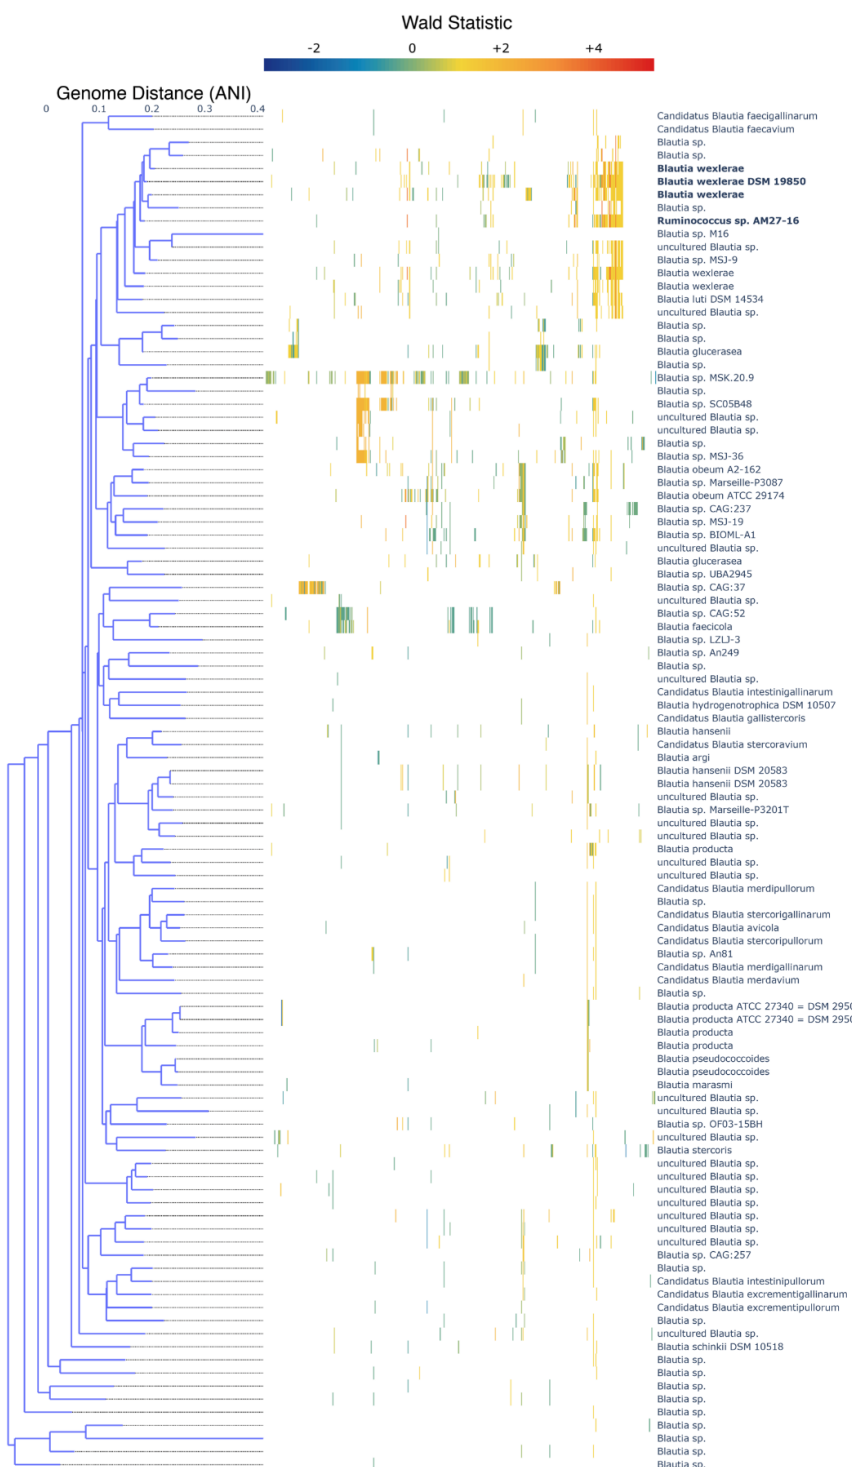

**Figure S3.** Fine scale mapping of genes identified in CAGs to genomes in the *Blautia* genus. Genes are mapped to genomes if they share 90% alignment identity at the amino acid level. The genes belonging to CAGs most consistently associated with anti-gp41 IgG pre vaccine have higher positive Wald statistics. Wald statistic indicates the association of each CAG among pre-vaccine gp41 levels in HVTN 106 participants.

## Supplemental Tables

**Table S1.** Participants by Country with Pre-Vaccine anti-gp41 IgG Data Passing QC Requirements

|      | Trial | BR | HT | JA | MZ | SZ  | SW | TZ | TH  | US  | ZM | ZB |
|------|-------|----|----|----|----|-----|----|----|-----|-----|----|----|
| HVTN | 96    |    |    |    |    |     | 80 |    |     |     |    |    |
| HVTN | 97    |    |    |    |    | 79  |    |    |     |     |    |    |
| HVTN | 98    |    |    |    |    |     |    |    |     | 54  |    |    |
| HVTN | 100   |    |    |    |    | 200 |    |    |     |     |    |    |
| HVTN | 106   |    |    |    |    |     | 12 |    |     | 65  |    |    |
| HVTN | 107   |    |    |    | 20 | 50  |    |    |     |     |    | 22 |
| HVTN | 111   |    |    |    |    | 51  |    | 25 |     |     | 21 |    |
| HVTN | 122   |    |    |    |    |     |    |    |     | 27  |    |    |
| RV   | 144   |    |    |    |    |     |    |    | 219 |     |    |    |
| HVTN | 204   | 20 | 9  | 12 |    | 175 |    |    |     | 123 |    |    |
| HVTN | 205   |    |    |    |    |     |    |    |     | 62  |    |    |
| HVTN | 505   |    |    |    |    |     |    |    |     | 144 |    |    |

Country abbreviations:

(BR) Brazil (HT) Haiti (JA) Jamaica (MZ) Mozambique (SZ) South Africa (SW) Switzerland (TZ) Tanzania (TH) Thailand (US) United States (ZM) Zambia (ZB) Zimbabwe

**Table S2.** Regression Models Comparing Log10-Transformed Pre-Vaccine anti-gp41 IgG in Participants from the United States and South Africa.

|               | Model 1 |                     |         | Model 2 |                     |         | Model 3 |                     |         |
|---------------|---------|---------------------|---------|---------|---------------------|---------|---------|---------------------|---------|
|               | Beta    | 95% CI <sup>†</sup> | p-value | Beta    | 95% CI <sup>†</sup> | p-value | Beta    | 95% CI <sup>†</sup> | p-value |
| age           | -0.002  | -0.008, 0.004       | 0.595   | -0.002  | -0.008, 0.004       | 0.49    | -0.002  | -0.008, 0.004       | 0.511   |
| sex           |         |                     |         |         |                     |         |         |                     |         |
| Male          | -0.107  | -0.195, -0.019      | 0.017   | -0.062  | -0.153, 0.030       | 0.188   | -0.063  | -0.150, 0.025       | 0.159   |
| country       |         |                     |         |         |                     |         |         |                     |         |
| United States | -0.214  | -0.308, -0.119      | <0.001  | -0.372  | -0.529, -0.214      | <0.001  | -0.373  | -0.527, -0.218      | <0.001  |
| trial         |         |                     |         |         |                     |         |         |                     |         |
| 98            |         |                     |         | 0.485   | 0.208, 0.763        | 0.001   | 0.485   | 0.213, 0.757        | <0.001  |
| 100           |         |                     |         | 0.237   | 0.064, 0.411        | 0.007   | 0.237   | 0.067, 0.408        | 0.006   |
| 106           |         |                     |         | 0.529   | 0.261, 0.797        | <0.001  | 0.528   | 0.265, 0.792        | <0.001  |
| 111           |         |                     |         | 0.197   | -0.044, 0.438       | 0.108   | 0.197   | -0.040, 0.433       | 0.103   |
| 122           |         |                     |         | 0.755   | 0.425, 1.084        | <0.001  | 0.754   | 0.431, 1.078        | <0.001  |
| 204           |         |                     |         | 0.407   | 0.229, 0.585        | <0.001  | 0.407   | 0.232, 0.581        | <0.001  |
| 205           |         |                     |         | 0.425   | 0.156, 0.695        | 0.002   | 0.426   | 0.161, 0.691        | 0.002   |
| 505           |         |                     |         | 0.262   | 0.018, 0.506        | 0.036   | 0.262   | 0.022, 0.501        | 0.032   |
| 107           |         |                     |         |         |                     |         | 0.601   | 0.369, 0.833        | <0.001  |

<sup>†</sup> CI = Confidence Interval

**SI Table 3.** Regression Models Comparing Log10-Transformed Pre-Vaccine anti-gp41 IgG Responses in Participants from the United States and South Africa in HVTN 204

|               | Model 1 |                     |         | Model 2 |                     |         |
|---------------|---------|---------------------|---------|---------|---------------------|---------|
|               | Beta    | 95% CI <sup>†</sup> | p-value | Beta    | 95% CI <sup>†</sup> | p-value |
| sex           |         |                     |         |         |                     |         |
| Male          | 0.097   | -0.039, 0.234       | 0.162   | 0.099   | -0.038, 0.236       | 0.156   |
| country       |         |                     |         |         |                     |         |
| United States | -0.379  | -0.517, -0.241      | <0.001  | 0.387   | -0.535, -0.239      | <0.001  |
| age           |         |                     |         | 0.001   | -0.008, 0.010       | 0.763   |

<sup>†</sup> CI = Confidence Interval

**Table S4.** Regressions of Vaccine-Matched Mean log10 gp120 MFI by Trial

|                        | estimate | SE   | p.value |                        | estimate | SE   | p.value |
|------------------------|----------|------|---------|------------------------|----------|------|---------|
| <b>HVTN 106</b>        |          |      |         | <b>HVTN 100</b>        |          |      |         |
| (Intercept)            | -0.75    | 0.72 | 0.30    | (Intercept)            | 0.01     | 0.60 | 0.98    |
| log10 pre-vaccine gp41 | 0.57     | 0.22 | 0.01    | log10 pre-vaccine gp41 | 0.15     | 0.15 | 0.33    |
| male                   | -0.22    | 0.23 | 0.33    | male                   | -0.22    | 0.16 | 0.15    |
| age                    | -0.01    | 0.01 | 0.21    | age                    | -0.01    | 0.02 | 0.59    |
| <b>HVTN 122</b>        |          |      |         | <b>HVTN 107</b>        |          |      |         |
| (Intercept)            | 1.09     | 1.42 | 0.45    | (Intercept)            | -1.16    | 1.01 | 0.25    |
| log10 pre-vaccine gp41 | -0.14    | 0.51 | 0.78    | log10 pre-vaccine gp41 | 0.40     | 0.30 | 0.19    |
| male                   | -0.91    | 0.41 | 0.04    | male                   | -0.21    | 0.21 | 0.31    |
| age                    | -0.01    | 0.02 | 0.56    | age                    | 0.01     | 0.02 | 0.75    |
| <b>HVTN 204</b>        |          |      |         | <b>HVTN 111</b>        |          |      |         |
| (Intercept)            | -0.87    | 0.48 | 0.07    | (Intercept)            | 0.47     | 0.82 | 0.56    |
| log10 pre-vaccine gp41 | 0.02     | 0.14 | 0.88    | log10 pre-vaccine gp41 | 0.12     | 0.21 | 0.57    |
| male                   | 0.04     | 0.16 | 0.78    | male                   | -0.52    | 0.21 | 0.02    |
| age                    | 0.03     | 0.01 | 0.01    | age                    | -0.02    | 0.02 | 0.35    |
| <b>HVTN 205</b>        |          |      |         | <b>HVTN 97</b>         |          |      |         |
| (Intercept)            | -0.60    | 0.90 | 0.51    | (Intercept)            | 1.14     | 0.98 | 0.25    |
| log10 pre-vaccine gp41 | 0.20     | 0.26 | 0.44    | log10 pre-vaccine gp41 | -0.24    | 0.26 | 0.36    |
| male                   | 0.17     | 0.27 | 0.54    | male                   | -0.05    | 0.27 | 0.86    |
| age                    | 0.00     | 0.02 | 0.99    | age                    | -0.03    | 0.03 | 0.45    |
| <b>HVTN 505</b>        |          |      |         | <b>HVTN 144</b>        |          |      |         |
| (Intercept)            | 0.13     | 0.52 | 0.80    | (Intercept)            | -0.85    | 0.32 | 0.01    |
| log10 pre-vaccine gp41 | -0.11    | 0.16 | 0.49    | log10 pre-vaccine gp41 | 0.35     | 0.13 | 0.01    |
| age                    | 0.00     | 0.01 | 0.73    | male                   | 0.11     | 0.14 | 0.45    |
| <b>HVTN 96</b>         |          |      |         |                        |          |      |         |
| (Intercept)            | -0.95    | 0.75 | 0.21    |                        |          |      |         |
| log10 pre-vaccine gp41 | -0.14    | 0.23 | 0.55    |                        |          |      |         |
| male                   | 0.61     | 0.23 | 0.01    |                        |          |      |         |
| age                    | 0.03     | 0.02 | 0.03    |                        |          |      |         |
| <b>HVTN 98</b>         |          |      |         |                        |          |      |         |
| (Intercept)            | 2.24     | 0.83 | 0.01    |                        |          |      |         |
| log10 pre-vaccine gp41 | -0.31    | 0.27 | 0.25    |                        |          |      |         |
| male                   | -0.83    | 0.27 | 0.00    |                        |          |      |         |
| age                    | -0.03    | 0.01 | 0.03    |                        |          |      |         |

**Table S5.** Beta-Binomial Regression Results of Taxa Associated with pre-Vaccine anti-gp4 IgG

| Taxa                                                                                  | Taxa ID | Estimate | 95% CI         | p-value | q-value |
|---------------------------------------------------------------------------------------|---------|----------|----------------|---------|---------|
| Ruminococcus sp. AM22-13<br>(high average nucleotide identity to<br>Blautia wexlerie) | 2292074 | 2.5      | [1.4 , 3.5]    | 6E-05   | 3E-04   |
| Ruminococcus sp. AM27-16<br>(high average nucleotide identity to<br>Blautia wexlerie) | 2293192 | 0.9      | [0.5 , 1.3]    | 2E-04   | 8E-04   |
| Blautia wexlerae                                                                      | 418240  | 0.9      | [0.5 , 1.4]    | 5E-04   | 2E-03   |
| Coprococcus sp. OM04-5BH                                                              | 2293093 | 1.2      | [0.6 , 1.8]    | 7E-04   | 3E-03   |
| Acetobacterium sp. KB-1                                                               | 2184575 | 3.3      | [1.6 , 5]      | 7E-04   | 3E-03   |
| Bilophila sp. 4_1_30                                                                  | 693988  | 1.5      | [0.7 , 2.2]    | 9E-04   | 4E-03   |
| Bilophila                                                                             | 35832   | 1.1      | [0.5 , 1.6]    | 1E-03   | 5E-03   |
| Bilophila wadsworthia                                                                 | 35833   | 1.1      | [0.5 , 1.8]    | 1E-03   | 5E-03   |
| Anaeroglobus geminatus                                                                | 156456  | 2.6      | [1.2 , 4.1]    | 1E-03   | 7E-03   |
| Akkermansia sp. KLE1797                                                               | 1574264 | -13.5    | [-21.7 , -5.4] | 3E-03   | 1E-02   |
| Coprobacillus sp. AM32-11LB                                                           | 2293080 | 2.0      | [0.8 , 3.2]    | 3E-03   | 1E-02   |
| Bacillales                                                                            | 1385    | 0.3      | [0.1 , 0.5]    | 3E-03   | 1E-02   |
| Lachnospira pectinoschiza                                                             | 28052   | 1.2      | [0.5 , 2]      | 3E-03   | 1E-02   |
| Pseudoflavonifractor sp. An44                                                         | 1965635 | 1.3      | [0.5 , 2.1]    | 3E-03   | 1E-02   |
| Clostridium beijerinckii                                                              | 1520    | 3.5      | [1.3 , 5.7]    | 4E-03   | 2E-02   |
| Anaerobiospirillum thomasii                                                           | 179995  | 1.7      | [0.6 , 2.7]    | 4E-03   | 2E-02   |
| Bacteroides sp. AM18-9                                                                | 2292940 | -7.1     | [-11.7 , -2.5] | 5E-03   | 2E-02   |
| unclassified Erysipelotrichaceae                                                      | 544447  | 1.5      | [0.5 , 2.5]    | 5E-03   | 2E-02   |
| Lactonifactor                                                                         | 420345  | 3.2      | [1.1 , 5.3]    | 5E-03   | 2E-02   |
| Synergistes jonesii                                                                   | 2754    | 0.9      | [0.3 , 1.6]    | 6E-03   | 3E-02   |
| Aquitalea sp. MWU14-2217                                                              | 2480983 | 1.7      | [0.6 , 2.8]    | 6E-03   | 3E-02   |



|                                |         |      |               |       |       |
|--------------------------------|---------|------|---------------|-------|-------|
| Rikenellaceae bacterium        | 2049048 | 1.0  | [0.3 , 1.7]   | 6E-03 | 3E-02 |
| Blautia sp. Marseille-P3201T   | 1907659 | 0.9  | [0.3 , 1.5]   | 7E-03 | 3E-02 |
| Brachyspira hyodysenteriae     | 159     | 1.5  | [0.5 , 2.5]   | 8E-03 | 4E-02 |
| Ruminococcus sp. TM09-4        | 2293244 | 0.8  | [0.2 , 1.3]   | 8E-03 | 4E-02 |
| Faecalibacterium sp. AM43-5AT  | 2302957 | 0.8  | [0.2 , 1.3]   | 9E-03 | 4E-02 |
| Eubacterium sp. 3_1_31         | 457402  | 1.7  | [0.5 , 3]     | 1E-02 | 4E-02 |
| Peptoniphilus sp. BV3C26       | 1111134 | -4.5 | [-7.7 , -1.3] | 1E-02 | 5E-02 |
| Coprobacillus sp. AF35-8       | 2293070 | 1.3  | [0.4 , 2.3]   | 1E-02 | 5E-02 |
| Pseudoflavonifractor sp. An187 | 1965578 | 3.3  | [0.9 , 5.7]   | 1E-02 | 5E-02 |
| [Clostridium] spiroforme       | 29348   | 0.6  | [0.2 , 1.1]   | 1E-02 | 5E-02 |
